# Supplementary material for: Overexpression of a Grape MYB Transcription Factor Gene VhMYB2 Increases Salinity and Drought Tolerance in Arabidopsis thaliana
Source: MDPI journal article supplement (doi:10.3390/ijms241310743), 2023-06-28
Supplement: s1 [file s1]

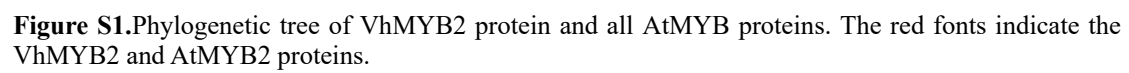

**Figure S1.**Phylogenetic tree of VhMYB2 protein and all AtMYB proteins. The red fonts indicate the VhMYB2 and AtMYB2 proteins.
