# Supplementary material for: Overexpression of a Grape MYB Transcription Factor Gene VhMYB2 Increases Salinity and Drought Tolerance in Arabidopsis thaliana
Source: MDPI journal article supplement (doi:10.3390/ijms241310743), 2023-06-28
Supplement: s1 [file s1]

**Table S1.** List of primers used in this study.

| Primer Name         | Primer Sequence (5'→3')                        | Purpose                           |
|---------------------|------------------------------------------------|-----------------------------------|
| <i>VhMYB2</i> -qF   | AGAGTTGCAGGCTGAGATGGTT                         | qPCR                              |
| <i>VhMYB2</i> -qR   | CAGGTGTTGGGCTATTTTGA                           | qPCR                              |
| <i>VvActin</i> -F   | CTTGCATCCCTCAGCACCTT                           | qPCR                              |
| <i>VvActin</i> -R   | TCCTGTGGACAATGGATGGA                           | qPCR                              |
| <i>VhMYB2</i> -F    | ATGGTGGTGAGCGAGAGAGG                           | full-length cDNA of <i>VvMYB2</i> |
| <i>VhMYB2</i> -R    | CTAGAAGTCGTCAAAGAACTGTTGC                      | full-length cDNA of <i>VvMYB2</i> |
| <i>HR</i> -F        | ATTTGGAGAGGACAGGGTACCATGGTGGTGAGCGAGAGAGG      | PCR for homologous recombination  |
| <i>HR</i> -R        | TGCCTGCAGGTCGACTCTAGAGAAGTCGTCAAAGAACTGTTGCCTT | PCR for homologous recombination  |
| <i>VhMYB2</i> -slF  | GAGCTCGGTACCCGGGGATCCATGGTGGTGAGCGAGAGAGG      | For subcellular location          |
| <i>VhMYB2</i> -slR  | GCCCTTGCTCACCATGTCGACGAAGTCGTCAAAGAACTGTTGCCTT | For subcellular location          |
| <i>AtP5CS1</i> -F   | AGGGAAAGTTCCAGAAAAG                            | qPCR                              |
| <i>AtP5CS1</i> -R   | CATAACTAAGCGAGCCAC                             | qPCR                              |
| <i>AtCAT1</i> -F    | GTCCTGGGATTCAGACAGGC                           | qPCR                              |
| <i>AtCAT1</i> -R    | GGCCTCACGTTAAGACGAGT                           | qPCR                              |
| <i>AtNCED3</i> -F   | TTGATGCTCCAGATTGCTTC                           | qPCR                              |
| <i>AtNCED3</i> -R   | GGACCCTATCACGACGACTT                           | qPCR                              |
| <i>AtSnRK2.6</i> -F | AGATCCCGAGGAACCAAAGA                           | qPCR                              |
| <i>AtSnRK2.6</i> -R | CTCTTTGCAGGGTCAGCAAC                           | qPCR                              |
| <i>AtSOS2</i> -F    | GCAAGGGAAGAAGAAGAAGT                           | qPCR                              |
| <i>AtSOS2</i> -R    | TCTCCGCTACATAACTGCC                            | qPCR                              |
| <i>AtSOS3</i> -F    | GAATCCATCGCTCATCA                              | qPCR                              |
| <i>AtSOS3</i> -R    | CCATTCTTCCTCTTCACA                             | qPCR                              |

---

|                   |                           |      |
|-------------------|---------------------------|------|
| <i>AtSOS1</i> -F  | TTCATCATCCTCACAATGGCTCTAA | qPCR |
| <i>AtSOS1</i> -R  | CCCTCATCAAGCATCTCCCAGTA   | qPCR |
| <i>AtNHX1</i> -F  | AGCCTTCAGGGAACCACAAT      | qPCR |
| <i>AtNHX1</i> -R  | CTCCAAAGACGGGTCGCATG      | qPCR |
| <i>AtActin</i> -F | TTACCCGATGGGCAAGTCA       | qPCR |
| <i>AtActin</i> -R | AAACGAGGGCTGGAACAAGA      | qPCR |

---
